# Supplementary material
Source: PubMed Central journal article supplement (PMC8097445)
Supplement: AAC.01305-20-s0001.pdf [file AAC.01305-20-s0001.pdf]

**Supplemental Table S1.** List of selective compounds tested in the flucytosine combinational study

| <b>NCGC ID</b>  | <b>Compound name</b>   |
|-----------------|------------------------|
| NCGC00094815-06 | Broxyquinoline         |
| NCGC00274060-05 | Posaconazole           |
| NCGC00179034-21 | Pentamidine            |
| NCGC00160664-05 | Nitroxoline            |
| NCGC00386349-01 | Anidulafungin          |
| NCGC00163597-03 | Myriocin               |
| NCGC00164622-02 | Voriconazole           |
| NCGC00345886-01 | Caspofungin            |
| NCGC00160566-02 | Broquinaldol           |
| NCGC00025000-09 | Ketoconazole           |
| NCGC00018098-09 | Diiodohydroxyquinoline |
| NCGC00016533-23 | Sulfamethoxazole       |
| NCGC00016391-13 | Clioquinol             |
| NCGC00090808-16 | Amphotericin B         |

**Supplemental Table S2.** Hits from present study and reported by Wall et al.

| Drug name                                  | Wall et al                |                             | Present study              |                             | In our library |
|--------------------------------------------|---------------------------|-----------------------------|----------------------------|-----------------------------|----------------|
|                                            | % inhibition (20 $\mu$ M) | IC <sub>50</sub> ( $\mu$ M) | % inhibition (7.7 $\mu$ M) | IC <sub>50</sub> ( $\mu$ M) |                |
| R(-) Apomorphine hydrochloride hemihydrate | >90%                      | 6.928                       |                            |                             | No             |
| Suloctidil                                 | >90%                      | Not confirmed               | 0%                         |                             | Yes            |
| Ebselen                                    | >90%                      | 1.413                       |                            |                             | No             |
| Nisoldipine                                | 79%                       | 29.42                       | 0%                         |                             | Yes            |
| Argatroban                                 | >90% (on single plate)    | Not Confirmed               | 0%                         |                             | Yes            |
| Dimethisoquin hydrochloride                | 70%                       | 28.61                       | 15.4%                      |                             | Yes            |
| Pentetic acid                              | >90%                      | 11.15                       | 72.4%                      | Not confirmed               | Yes            |
| Pentamidine isethionate                    | 87%                       | 72.94                       | 40.2%                      | Not confirmed               | Yes            |
| Pyrvinium pamoate                          | 75%                       | 7.192                       |                            |                             | No             |
| Thimerosal                                 | >90%                      | N/A                         | 97.5%                      | N/A due to known toxicity   | Yes            |
| Clioquinol                                 | >90%                      | N/A                         | 96.3%                      | 1.54                        | Yes            |
| Thonzonium bromide                         | >90%                      | N/A                         | 12.9%                      |                             | Yes            |
| Hexachlorophene                            | >90%                      | N/A                         | 0%                         |                             | Yes            |
| Chlorhexidine                              | >90%                      | N/A                         | 0%                         |                             | Yes            |
| Chloroxine                                 | >90%                      | N/A                         | 99.8%                      | 1.54                        | Yes            |
| Dequalinium dichloride                     | >90%                      | N/A                         | 52.8%                      | Not confirmed               | Yes            |
| Methyl benzethonium chloride               | >90%                      | N/A                         | 0%                         |                             | Yes            |
| Benzethonium chloride                      | >90%                      | N/A                         | 0%                         |                             | Yes            |
| Alexidine dihydrochloride                  | >90%                      | N/A                         | 97.7%                      | 5.45                        | Yes            |
| Merbromin                                  | >90%                      | N/A                         |                            |                             | No             |
| Cycloheximide                              | >90%                      | N/A                         | 95.9%                      | 2.73                        | Yes            |
| Tioconazole                                | >90%                      | N/A                         | 30.8%                      | 5.45 (30 % efficacy)        | Yes            |
| Ketoconazole                               | >90%                      | N/A                         | 91.2%                      | 1.72                        | Yes            |
| Ciclopirox ethanolamine                    | >90%                      | N/A                         | 57.0%                      | 7.90                        | Yes            |
| Terconazole                                | >90%                      | N/A                         |                            |                             | No             |
| Voriconazole                               | >90%                      | N/A                         | 88.8%                      | 4.33                        | Yes            |
| Flucytosine                                | >90%                      | N/A                         | 95.3%                      | 0.97                        | Yes            |

**Supplemental Table S3.** Protocol for ATP-based antifungal susceptibility assays

| Step | Parameter            | Value              | Description                          |
|------|----------------------|--------------------|--------------------------------------|
| 1    | Medium               | 22.5 $\mu$ l/well  | RPMI Medium                          |
| 2    | Compound             | 0.023 $\mu$ l/well | Compound in DMSO or H <sub>2</sub> O |
| 3    | <i>Candida auris</i> | 7.5 $\mu$ l/well   | <i>Candida auris</i> in RPMI Medium  |
| 4    | Incubate             | 24 h               | 35 °C, 5%CO <sub>2</sub>             |
| 5    | Detection reagent    | 20 $\mu$ l/well    | ATP content assay reagent            |
| 6    | Incubate             | 10 min             | Room temperature                     |
| 7    | Read                 | Luminescence mode  | EnVision                             |

# Figure S1

(A)

Strain 0384: DMSO with positive control plate

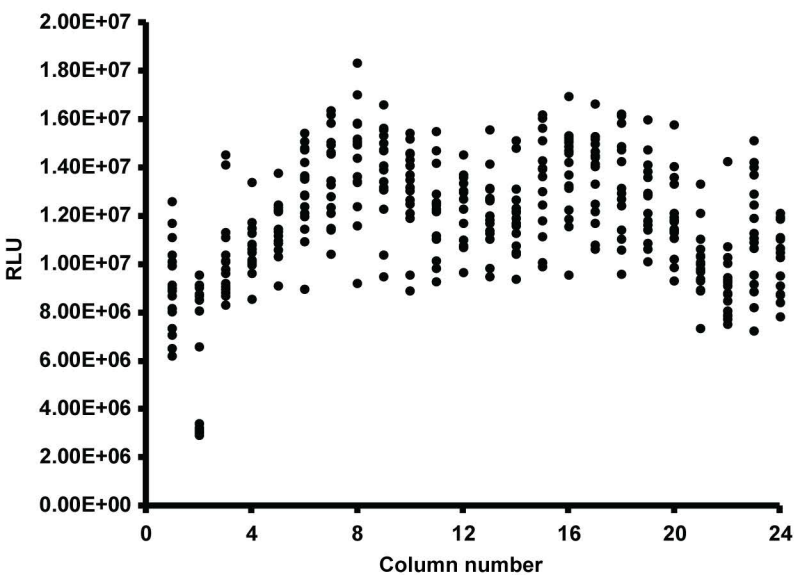

(B)

Strain 0385: DMSO with positive control plate

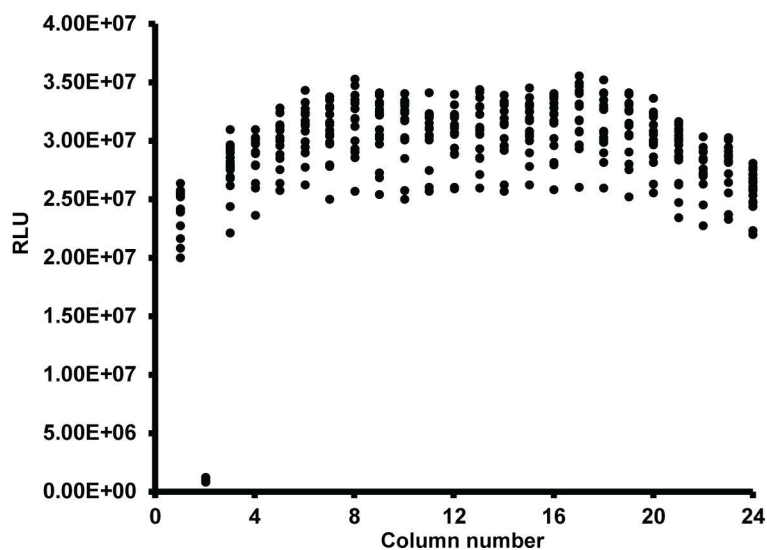

(C)

Strain 0390: DMSO with positive control plate

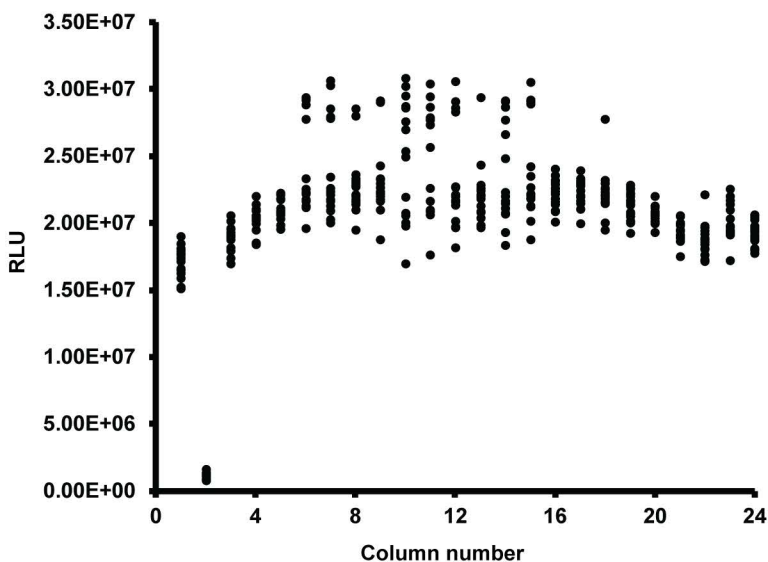

(D)

Statistic table:

|                     | 0384  | 0385  | 0390  |
|---------------------|-------|-------|-------|
| S/B                 | 3.88  | 26.59 | 24.44 |
| CV (%) <sup>1</sup> | 18.78 | 10.17 | 14.41 |
| Z' <sup>1</sup>     | 0.19  | 0.67  | 0.54  |

<sup>1</sup> normalized against micafungin treated wells

Figure S1. DMSO control plates. Scatterplots of DMOS plate for strains (A) 0384, (B) 0385, and (C) 0390. (D) Statistical values for each strain.
